# Supplementary material for: Hydroxy Selenomethionine Alleviates Hepatic Lipid Metabolism Disorder of Pigs Induced by Dietary Oxidative Stress via Relieving the Endoplasmic Reticulum Stress
Source: MDPI journal article supplement (doi:10.3390/antiox11030552), 2022-03-15
Supplement: s1 [file s1]

## Supplementary Information

**Table S1. Composition and nutrient levels of the basal diet (air-dry basis, %)**

| Ingredients          | Phase    |         |
|----------------------|----------|---------|
|                      | 25-50 kg | > 50 kg |
| Corn                 | 73.610   | 70.525  |
| Soybean meal         | 17.900   | 6.500   |
| Fish meal            | 2.700    | -       |
| Rapeseed dregs       | -        | 6.500   |
| DDGS                 | -        | 8.000   |
| Wheat bran           | -        | 1.000   |
| Corn oil             | 2.000    | 3.000   |
| Fish oil             | 1.000    | 2.000   |
| CaHPO <sub>4</sub>   | 0.670    | 0.550   |
| Limestone            | 0.930    | 0.900   |
| NaCl                 | 0.300    | 0.200   |
| L-lysine HCl         | 0.440    | 0.470   |
| DL-Methionine        | 0.100    | 0.030   |
| L-Threonine          | 0.120    | 0.090   |
| L-Tryptophan         | 0.030    | 0.035   |
| Premix <sup>1</sup>  | 0.200    |         |
| Premix <sup>2</sup>  |          | 0.200   |
| Total                | 100      | 100     |
| Nutrient composition |          |         |
| DE (Mcal/kg)         | 3.40     | 3.48    |
| CP (%)               | 15.69    | 13.64   |
| Ca (%)               | 0.66     | 0.53    |
| AP (%)               | 0.31     | 0.24    |
| SID Lys (%)          | 0.98     | 0.74    |
| SID Met+cys (%)      | 0.54     | 0.43    |
| SID Thr (%)          | 0.59     | 0.47    |
| SID Trp (%)          | 0.17     | 0.14    |

Note: (1) Premix<sup>1</sup> for 25-50 kg pig provided (per kg): Cu (CuSO<sub>4</sub>·5H<sub>2</sub>O), 4 mg; I (KI), 0.14 mg; Fe (FeSO<sub>4</sub>·7H<sub>2</sub>O), 60 mg; Mn (MnSO<sub>4</sub>·H<sub>2</sub>O), 2 mg; Zn (ZnSO<sub>4</sub>·H<sub>2</sub>O), 60 mg; 50% Choline chloride, 75 mg; Vitamin A, 1500 IU; Vitamin D3, 500 IU; Vitamin E, 4 mg; Vitamin K3, 0.5 mg; Vitamin B1, 0.5 mg; Vitamin B2, 1.25 mg; Vitamin B6, 0.6 mg; Vitamin B12, 6 µg; D-biotin, 25 µg; D-pantothenic acid, 2.5 mg; Folic acid, 0.25 mg; Nicotinamide, 5 mg.

(2) Premix<sup>2</sup> for > 50 kg pig provided (per kg): Cu (CuSO<sub>4</sub>·5H<sub>2</sub>O), 7 mg; I (KI), 0.2 mg; Fe (FeSO<sub>4</sub>·7H<sub>2</sub>O), 100 mg; Mn (MnSO<sub>4</sub>·H<sub>2</sub>O), 4 mg; Zn (ZnSO<sub>4</sub>·H<sub>2</sub>O), 50 mg; 50% Choline chloride, 200 mg; Vitamin A, 450 IU; Vitamin D3, 150 IU; Vitamin E, 1.2 mg; Vitamin K3, 0.15 mg; Vitamin B1, 0.15 mg; Vitamin B2, 0.375 mg; Vitamin B6, 0.18 mg; Vitamin B12, 1.8 µg; D-biotin, 7.5 µg; D-pantothenic acid, 0.75 mg; Folic acid, 75 µg; Nicotinamide, 1.5 mg.

**Table S2 The oxidation Characteristics of the diets**

| Item                          | CON    | DOS    | DOS + 0.3 Se | DOS + 0.6 Se | DOS + 0.9 Se |
|-------------------------------|--------|--------|--------------|--------------|--------------|
| Diet for 25-50 kg             |        |        |              |              |              |
| AV (mg KOH/100 g)             | 56.70  | 238.90 | 238.40       | 233.30       | 240.20       |
| POV (mmol O <sub>2</sub> /kg) | 19.60  | 433.60 | 415.70       | 429.20       | 414.60       |
| IV (g I/100 g)                | 126.70 | 81.20  | 83.90        | 83.50        | 82.10        |
| SV (mg KOH/g)                 | 182.10 | 237.70 | 240.60       | 248.30       | 242.70       |
| Diet for > 50 kg              |        |        |              |              |              |
| AV (mg KOH/100 g)             | 68.00  | 252.60 | 253.70       | 264.60       | 257.40       |
| POV (mmol O <sub>2</sub> /kg) | 31.80  | 519.20 | 523.60       | 537.80       | 534.20       |
| IV (g I/100 g)                | 111.70 | 73.40  | 73.60        | 74.70        | 72.80        |
| SV (mg KOH/g)                 | 195.40 | 261.30 | 265.70       | 268.20       | 266.70       |

AV, acid value; POV, peroxide value; IV, iodine value; SV, saponification value.

**Table S3. Primers used for the Q-PCR**

| Gene                                 | Accession number | Primer pairs (5' to 3' direction)                 |
|--------------------------------------|------------------|---------------------------------------------------|
| <b>Housekeeping control genes</b>    |                  |                                                   |
| <i>β-Actin</i>                       | AY550069         | F:CCCAAAGCCAACCGTGAGAA<br>R:CCACGTACATGGCTGGGGTG  |
| <i>Gapdh</i>                         | NM_001206359     | F:CAGCAATGCCTCCTGTACCA<br>R:CCACGATGCCGAAGTTGTC   |
| <b>Lipid metabolic-related genes</b> |                  |                                                   |
| <i>ACACA</i>                         | NM_001114269.1   | F:CAAGACCACCAACGCGAAA<br>R:GGCAAATGGGAGGCAATAAGA  |
| <i>FASN</i>                          | NM_001099930     | F:CAAGCAGGCGAACACGATG<br>R:AAGGGAAGCAGGGTTGATGC   |
| <i>SCD</i>                           | NM_213781.1      | F:CAAACACCCAGCCGTCAAAG<br>R:AGCTTCACCCAGCAATACC   |
| <i>DGAT1</i>                         | NM_214051.1      | F:ACAAGGACAAGGACGGACAC<br>R:ATGCCACGGTAGTTGCTGAA  |
| <i>DGAT2</i>                         | NM_001160080.1   | F:ATGCCCTACTCCAAGCCCA<br>R:CCGAACTTGGTCTTGTGCTG   |
| <i>G6PD</i>                          | XM_003360515.5   | F:TGGTGGCTGTTCCGAGATG<br>R:GGCGTAGCCACGATGTATG    |
| <i>SREBP1c</i>                       | NM_214157.1      | F:AAGCGGACGGCTCACAATG<br>R:GCAAGACGGCGGATTTATTCA  |
| <i>CPT1a</i>                         | NM_001129805.1   | F:TGGTGTCCAAATACCTCGCC<br>R:CCTCCGCTCGACACATACTC  |
| <i>CPT1b</i>                         | NM_001007191.1   | F:GCGCCGCGTGAAAGC<br>R:GATCCCAGTCCCGGTCATG        |
| <i>CPT2</i>                          | NM_001246243.1   | F:CGAGTGTTCCGAGTACCACAA<br>R:CAAGTGTCGGTCAAAGCCCT |
| <i>HSL</i>                           | NM_214315        | F:CTCGTGGCTCAACTCCTTCCT                           |

|                                                |                |                                                                           |
|------------------------------------------------|----------------|---------------------------------------------------------------------------|
| <i>LIPC</i>                                    | NM_001143714.1 | R:GCCGCATTGGCTCTTCTGT<br>F:AGCAGGAGAAACCCAGCAAA<br>R:CCTGGGTTGGGTGAAGTTGT |
| <i>ATGL1</i>                                   | NM_001098605.1 | F:CAAGAGCACCATCACCGTGTCC<br>R:AGGCCGTCCCTGTAACCCT                         |
| <i>ACAA1</i>                                   | XM_021071664.1 | F:TCTGCGTGGGAAATGTGCTT<br>R:CTCAGAAACTGGGCGATTCTG                         |
| <i>ACAA2</i>                                   | NM_001167638.1 | F:TCGTGGGCTATTTTTCGTCT<br>R:TCCTGCTTTCTTCAGTGCCC                          |
| <i>ACOX1</i>                                   | NM_001101028.1 | F:GCCGCCGAGAGATCGAAA<br>R:GGATGTCCTCGCTGCACAAA                            |
| <i>ACADL</i>                                   | NM_213897.1    | F:GCGTGGCTTATGACTGTGTG<br>R:ACTCGGGCATCCACATAAGC                          |
| <i>ECH1</i>                                    | NM_001044607.2 | F:GCTAAACCGGCCAGAGAAGA<br>R:AGATGTCCGAAGCCATGTCC                          |
| <b>Endoplasmic reticulum stress biomarkers</b> |                |                                                                           |
| <i>PERK</i>                                    | XM_003124925.4 | F:CTGTACCCATTTCGGCACTCA<br>R:ATGTCCTGCACCATCGCAAA                         |
| <i>eIF2<math>\alpha</math></i>                 | XM_001928339.4 | F:AATAGGCGTTTGACCCACACA<br>R:TGTTCTCTCCAGGGTGGTTG                         |
| <i>ATF4</i>                                    | NM_001123078.1 | F:ATGCCCTGTTCGGGTATAGATGA<br>R:ATCCAACGTGGCCAAAAGC                        |
| <i>CHOP</i>                                    | NM_001144845.1 | F:GGAAATGAGGAGGAGTCAAAAACC<br>R:CTCAGTCAGCCAAGCCAGAGA                     |
| <i>IRE1</i>                                    | XM_005668695.3 | F:CTGAGCGAAGACTGCAAGGA<br>R:GAGTATGTTGGCCTGACGCT                          |
| <i>XBP-1</i>                                   | NM_001142836.1 | F:CAGACTGCCAGAGACCGAAAGA<br>R:TCTTCCAAATCTACCACTTGTTGCT                   |
| <i>ATF6</i>                                    | XM_021089516.1 | F:GGGAGTGAGCTGCAGGTGTATT<br>R:TCTGCGGATGGCTTCAAAGA                        |
| <i>GRP78</i>                                   | XM_001927795.7 | F:TGGGAAAGAAGGTTACTCATGCA<br>R:CTGGCGTTGGGCATCATT                         |
| <b>Selenoprotein-encoding genes</b>            |                |                                                                           |
| <i>DIO1</i>                                    | NM_001001627   | F:CATGGCCAAGAACCCTCACT<br>R:CCAGAAATACTGGGCACTGAAGA                       |
| <i>DIO2</i>                                    | NM_001001626   | F:CGCTGCATCTGGAAGAGCTT<br>R:TGGAATTGGGTGCATCTTCA                          |
| <i>DIO3</i>                                    | NM_001001625   | F:TGAAGTGGAGCTCAACAGTGATG<br>R:TGTCGTCAGACACGCAGATAGG                     |
| <i>GPX1</i>                                    | NM_214201      | F:GATGCCACTGCCCTCATGA<br>R:TCGAAGTTCCATGCGATGTC                           |
| <i>GPX2</i>                                    | NM_001115136   | F:AGAATGTGGCCTCGCTCTGA<br>R:GGCATTGCAGCTCGTTGAG                           |
| <i>GPX3</i>                                    | NM_001115155   | F:CCGGTTCCTGTTTTCCAAATT<br>R:TGCACTGCAGGAAGAGTTTGAA                       |
| <i>GPX4</i>                                    | NM_214407      | F:TGAGGCAAGACGGAGGTAAACT<br>R:TCCGTAAACCACACTCAGCATATC                    |
| <i>GPX6</i>                                    | NM_001137607   | F:GAGCTGAAGCCTTTTGGTGTAGTT                                                |

|                |              |                                                                                |
|----------------|--------------|--------------------------------------------------------------------------------|
| <i>MSRBI</i>   | NM_001097460 | R:CTTTGCTGGTTCTTGTTTTCCA<br>F:ATCCCTAAAGGCCAAGAATCATC<br>R:GGCCACCAAGCAGTGTTCA |
| <i>SELENOF</i> | NM_001085443 | F:ACAGCCCTGCCAAGCAGAT<br>R:AACAGGGAGGCTGGGTAACAC                               |
| <i>SELENOH</i> | NM_001184948 | F:TGGTGGAGGAGCTGAAGAAGTAC<br>R:CGTCATAAATGCTCCAACATCAC                         |
| <i>SELENOI</i> | NM_001244662 | F:GATGGTGTGGATGGAAAGCAA<br>R:GCCATGGTCAAAGAGTTCTCCTA                           |
| <i>SELENOK</i> | NM_001044553 | F:CAGGAAACCCCCCTAGAAGAA<br>R:CTCATCCACCGGCCATTG                                |
| <i>SELENOM</i> | NM_001161648 | F:CAGCTGAATCGCCTCAAAGAG<br>R:GAGATGTTTCATGACCAGGTTGTG                          |
| <i>SELENON</i> | XM_021095600 | F:ACCTGGTCCCTGGTGAAAGAG<br>R:AGGCCAGCCAGCTTCTTGT                               |
| <i>SELENOO</i> | NM_001201431 | F:CTTCCGACCCAGATGGAT<br>R:GGTTGCGACTGTGCCAGCAT                                 |
| <i>SELENOP</i> | NM_001134823 | F:AACCAGAAGCGCCAGACACT<br>R:TGCTGGCATATCTCAGTTCTCAGA                           |
| <i>SELENOS</i> | NM_001164113 | F:GAGGCAGAGGCACCTGGAT<br>R:CTGCTAAAGCCTCCTGTCGTTT                              |
| <i>SELENOT</i> | NM_001163408 | F:GGCTTAATAATCGTTGGCAAAGA<br>R:TGGCCCCATTGCCAGATA                              |
| <i>SELENOV</i> | NM_001166045 | F:CACTGGTCGCCAATGGATTC<br>R:AGTGGCCAACGGAGAAAGC                                |
| <i>SELENOW</i> | NM_213977    | F:CACCCCTGTCTCCCTGCAT<br>R:GAGCAGGATCACCCCAAACA                                |
| <i>SEPHS2</i>  | NM_001093735 | F:TGGCTTGATGCACACGTTTAA<br>R:TGCGAGTGTCCCAGAATGC                               |
| <i>TXNRD1</i>  | NM_214154    | F:GATTTAACAAGCGGGTCATGGT<br>R:CAACCTACATTACACACGTTCT                           |
| <i>TXNRD2</i>  | NM_001168702 | F:TCTTGAAAGGCGGAAAAGAGAT<br>R:TCGGTCGCCCTCCAGTAG                               |
| <i>TXNRD3</i>  | XM_013982024 | F:GTGCCCTACGTTTATGCTGTTG<br>R:TCCGAGCCACCAGCTTTG                               |

---

Table S4. The correlation analysis between the major selenoprotein-encoding genes and lipid metabolism markers

| Correlations |                     |        |        |         |         |         |        |         |         |         |         |         |       |        |        |        |        |        |         |         |         |         |         |         |        |         |         |
|--------------|---------------------|--------|--------|---------|---------|---------|--------|---------|---------|---------|---------|---------|-------|--------|--------|--------|--------|--------|---------|---------|---------|---------|---------|---------|--------|---------|---------|
|              |                     | GPX1   | GPX4   | SELENOH | SELENOP | SELENOW | DIO2   | SELENOF | SELENOK | SELENOM | SELENOS | SELENOT | FASN  | SCD    | DGAT1  | DGAT2  | G6PD   | SREBP1 | ACAA1   | ACAA2   | ACADL   | ACOX1   | ATGL1   | CPT1a   | CPT1b  | ECH1    | HSL     |
| GPX1         | Pearson Correlation | 1      | .785** | .676**  | .644**  | .869**  | .628** | .565**  | .860**  | .696**  | .568**  | .836**  | .379* | .711** | 0.089  | 0.075  | 0.113  | .699** | -.595** | -.526** | -.416*  | -.588** | -.404*  | -.602** | -0.298 | -.597** | -.424*  |
|              | Sig. (2-tailed)     |        | 0.000  | 0.000   | 0.000   | 0.000   | 0.000  | 0.001   | 0.000   | 0.000   | 0.001   | 0.000   | 0.039 | 0.000  | 0.640  | 0.694  | 0.554  | 0.000  | 0.001   | 0.003   | 0.022   | 0.001   | 0.027   | 0.000   | 0.110  | 0.000   | 0.020   |
|              | N                   | 30     | 30     | 30      | 30      | 30      | 30     | 30      | 30      | 30      | 30      | 30      | 30    | 30     | 30     | 30     | 30     | 30     | 30      | 30      | 30      | 30      | 30      | 30      | 30     | 30      | 30      |
| GPX4         | Pearson Correlation | .785** | 1      | .598**  | .626**  | .834**  | .558** | .605**  | .859**  | .762**  | .695**  | .891**  | 0.287 | .580** | 0.230  | 0.030  | 0.042  | .585** | -.518** | -.478** | -0.303  | -.556** | -0.300  | -.540** | -0.160 | -.544** | -.377*  |
|              | Sig. (2-tailed)     | 0.000  |        | 0.000   | 0.000   | 0.000   | 0.001  | 0.000   | 0.000   | 0.000   | 0.000   | 0.000   | 0.124 | 0.001  | 0.221  | 0.873  | 0.826  | 0.001  | 0.003   | 0.007   | 0.103   | 0.001   | 0.107   | 0.002   | 0.398  | 0.002   | 0.040   |
|              | N                   | 30     | 30     | 30      | 30      | 30      | 30     | 30      | 30      | 30      | 30      | 30      | 30    | 30     | 30     | 30     | 30     | 30     | 30      | 30      | 30      | 30      | 30      | 30      | 30     | 30      | 30      |
| SELENOH      | Pearson Correlation | .676** | .598** | 1       | .443*   | .874**  | .680** | .606**  | .733**  | .714**  | .550**  | .630**  | .422* | .623** | -0.024 | 0.005  | 0.212  | .660** | -.522** | -.580** | -.448*  | -.637** | -.424*  | -.651** | -0.291 | -.620** | -0.284  |
|              | Sig. (2-tailed)     | 0.000  | 0.000  |         | 0.014   | 0.000   | 0.000  | 0.000   | 0.000   | 0.000   | 0.002   | 0.000   | 0.020 | 0.000  | 0.898  | 0.979  | 0.261  | 0.000  | 0.003   | 0.001   | 0.013   | 0.000   | 0.020   | 0.000   | 0.118  | 0.000   | 0.128   |
|              | N                   | 30     | 30     | 30      | 30      | 30      | 30     | 30      | 30      | 30      | 30      | 30      | 30    | 30     | 30     | 30     | 30     | 30     | 30      | 30      | 30      | 30      | 30      | 30      | 30     | 30      | 30      |
| SELENOP      | Pearson Correlation | .644** | .626** | .443*   | 1       | .675**  | .710** | 0.242   | .691**  | .467**  | .695**  | .769**  | 0.290 | .650** | -0.005 | 0.020  | -0.124 | .577** | -.370*  | -.465** | -0.190  | -.496** | -.441*  | -.508** | -0.271 | -.543** | -.493** |
|              | Sig. (2-tailed)     | 0.000  | 0.000  | 0.014   |         | 0.000   | 0.000  | 0.198   | 0.000   | 0.009   | 0.000   | 0.000   | 0.120 | 0.000  | 0.981  | 0.915  | 0.515  | 0.001  | 0.044   | 0.010   | 0.313   | 0.005   | 0.015   | 0.004   | 0.147  | 0.002   | 0.006   |
|              | N                   | 30     | 30     | 30      | 30      | 30      | 30     | 30      | 30      | 30      | 30      | 30      | 30    | 30     | 30     | 30     | 30     | 30     | 30      | 30      | 30      | 30      | 30      | 30      | 30     | 30      | 30      |
| SELENOW      | Pearson Correlation | .869** | .834** | .874**  | .675**  | 1       | .782** | .649**  | .889**  | .838**  | .658**  | .881**  | .459* | .785** | 0.058  | 0.007  | 0.177  | .780** | -.628** | -.635** | -.491** | -.737** | -.452*  | -.757** | -0.319 | -.743** | -.406*  |
|              | Sig. (2-tailed)     | 0.000  | 0.000  | 0.000   | 0.000   |         | 0.000  | 0.000   | 0.000   | 0.000   | 0.000   | 0.000   | 0.011 | 0.000  | 0.763  | 0.970  | 0.349  | 0.000  | 0.000   | 0.000   | 0.006   | 0.000   | 0.012   | 0.000   | 0.086  | 0.000   | 0.026   |
|              | N                   | 30     | 30     | 30      | 30      | 30      | 30     | 30      | 30      | 30      | 30      | 30      | 30    | 30     | 30     | 30     | 30     | 30     | 30      | 30      | 30      | 30      | 30      | 30      | 30     | 30      | 30      |
| DIO2         | Pearson Correlation | .628** | .558** | .680**  | .710**  | .782**  | 1      | .457*   | .700**  | .608**  | .417*   | .705**  | 0.333 | .790** | 0.010  | 0.008  | 0.036  | .761** | -.489** | -.583** | -0.359  | -.695** | -.505** | -.729** | -.373* | -.732** | -.481** |
|              | Sig. (2-tailed)     | 0.000  | 0.001  | 0.000   | 0.000   | 0.000   |        | 0.011   | 0.000   | 0.000   | 0.022   | 0.000   | 0.072 | 0.000  | 0.957  | 0.967  | 0.852  | 0.000  | 0.006   | 0.001   | 0.051   | 0.000   | 0.004   | 0.000   | 0.042  | 0.000   | 0.007   |
|              | N                   | 30     | 30     | 30      | 30      | 30      | 30     | 30      | 30      | 30      | 30      | 30      | 30    | 30     | 30     | 30     | 30     | 30     | 30      | 30      | 30      | 30      | 30      | 30      | 30     | 30      | 30      |
| SELENOF      | Pearson Correlation | .565** | .605** | .606**  | 0.242   | .649**  | .457*  | 1       | .443*   | .830**  | 0.279   | .610**  | .367* | .670** | -0.026 | 0.159  | 0.289  | .594** | -.581** | -.578** | -.555** | -.645** | -0.251  | -.621** | -0.046 | -.608** | -0.038  |
|              | Sig. (2-tailed)     | 0.001  | 0.000  | 0.000   | 0.198   | 0.000   | 0.011  |         | 0.014   | 0.000   | 0.135   | 0.000   | 0.046 | 0.000  | 0.893  | 0.401  | 0.122  | 0.001  | 0.001   | 0.001   | 0.001   | 0.000   | 0.181   | 0.000   | 0.810  | 0.000   | 0.842   |
|              | N                   | 30     | 30     | 30      | 30      | 30      | 30     | 30      | 30      | 30      | 30      | 30      | 30    | 30     | 30     | 30     | 30     | 30     | 30      | 30      | 30      | 30      | 30      | 30      | 30     | 30      | 30      |
| SELENOK      | Pearson Correlation | .860** | .859** | .733**  | .691**  | .889**  | .700** | .443*   | 1       | .657**  | .731**  | .841**  | 0.323 | .601** | 0.208  | -0.125 | 0.060  | .707** | -.497** | -.490** | -0.278  | -.565** | -.429*  | -.584** | -0.304 | -.576** | -.510** |
|              | Sig. (2-tailed)     | 0.000  | 0.000  | 0.000   | 0.000   | 0.000   | 0.000  | 0.014   |         | 0.000   | 0.000   | 0.000   | 0.082 | 0.000  | 0.270  | 0.509  | 0.752  | 0.000  | 0.005   | 0.006   | 0.137   | 0.001   | 0.018   | 0.001   | 0.102  | 0.001   | 0.004   |
|              | N                   | 30     | 30     | 30      | 30      | 30      | 30     | 30      | 30      | 30      | 30      | 30      | 30    | 30     | 30     | 30     | 30     | 30     | 30      | 30      | 30      | 30      | 30      | 30      | 30     | 30      | 30      |
| SELENOM      | Pearson Correlation | .696** | .762** | .714**  | .467**  | .838**  | .608** | .830**  | .657**  | 1       | .429*   | .727**  | .454* | .781** | 0.083  | -0.013 | 0.292  | .746** | -.614** | -.606** | -.558** | -.710** | -0.307  | -.717** | -0.161 | -.701** | -0.100  |
|              | Sig. (2-tailed)     | 0.000  | 0.000  | 0.000   | 0.009   | 0.000   | 0.000  | 0.000   | 0.000   |         | 0.018   | 0.000   | 0.012 | 0.000  | 0.663  | 0.948  | 0.117  | 0.000  | 0.000   | 0.000   | 0.001   | 0.000   | 0.099   | 0.000   | 0.394  | 0.000   | 0.599   |
|              | N                   | 30     | 30     | 30      | 30      | 30      | 30     | 30      | 30      | 30      | 30      | 30      | 30    | 30     | 30     | 30     | 30     | 30     | 30      | 30      | 30      | 30      | 30      | 30      | 30     | 30      | 30      |
| SELENOS      | Pearson Correlation | .568** | .695** | .550**  | .695**  | .658**  | .417*  | 0.279   | .731**  | .429*   | 1       | .781**  | 0.188 | .446*  | 0.081  | -0.126 | -0.237 | .440*  | -0.240  | -0.299  | -0.081  | -0.270  | -.411*  | -0.294  | -0.135 | -0.296  | -.457*  |
|              | Sig. (2-tailed)     | 0.001  | 0.000  | 0.002   | 0.000   | 0.000   | 0.022  | 0.135   | 0.000   | 0.018   |         | 0.000   | 0.321 | 0.014  | 0.670  | 0.507  | 0.208  | 0.015  | 0.202   | 0.109   | 0.669   | 0.149   | 0.024   | 0.115   | 0.476  | 0.112   | 0.011   |
|              | N                   | 30     | 30     | 30      | 30      | 30      | 30     | 30      | 30      | 30      | 30      | 30      | 30    | 30     | 30     | 30     | 30     | 30     | 30      | 30      | 30      | 30      | 30      | 30      | 30     | 30      | 30      |
| SELENOT      | Pearson Correlation | .836** | .891** | .630**  | .769**  | .881**  | .705** | .610**  | .841**  | .727**  | .781**  | 1       | 0.279 | .738** | 0.059  | 0.040  | -0.086 | .679** | -.516** | -.533** | -0.358  | -.576** | -.396*  | -.598** | -0.244 | -.608** | -.455*  |
|              | Sig. (2-tailed)     | 0.000  | 0.000  | 0.000   | 0.000   | 0.000   | 0.000  | 0.000   | 0.000   | 0.000   | 0.000   |         | 0.136 | 0.000  | 0.756  | 0.834  | 0.651  | 0.000  | 0.003   | 0.002   | 0.052   | 0.001   | 0.030   | 0.000   | 0.194  | 0.000   | 0.011   |
|              | N                   | 30     | 30     | 30      | 30      | 30      | 30     | 30      | 30      | 30      | 30      | 30      | 30    | 30     | 30     | 30     | 30     | 30     | 30      | 30      | 30      | 30      | 30      | 30      | 30     | 30      | 30      |
| FASN         | Pearson Correlation | .379*  | 0.287  | .422*   | 0.290   | .459*   | 0.333  | .367*   | 0.323   | .454*   | 0.188   | 0.279   | 1     | .587** | -0.104 | 0.082  | 0.258  | .605** | -.709** | -.697** | -.728** | -.724** | -.619** | -.680** | -.392* | -.740** | -0.305  |
|              | Sig. (2-tailed)     | 0.039  | 0.124  | 0.020   | 0.120   | 0.011   | 0.072  | 0.046   | 0.082   | 0.012   | 0.321   | 0.136   |       | 0.001  | 0.585  | 0.667  | 0.169  | 0.000  | 0.000   | 0.000   | 0.000   |         |         |         |        |         |         |
