# Supplementary figures and images for: Hydroxy Selenomethionine Alleviates Hepatic Lipid Metabolism Disorder of Pigs Induced by Dietary Oxidative Stress via Relieving the Endoplasmic Reticulum Stress
Source: MDPI journal article supplement (doi:10.3390/antiox11030552), 2022-03-15

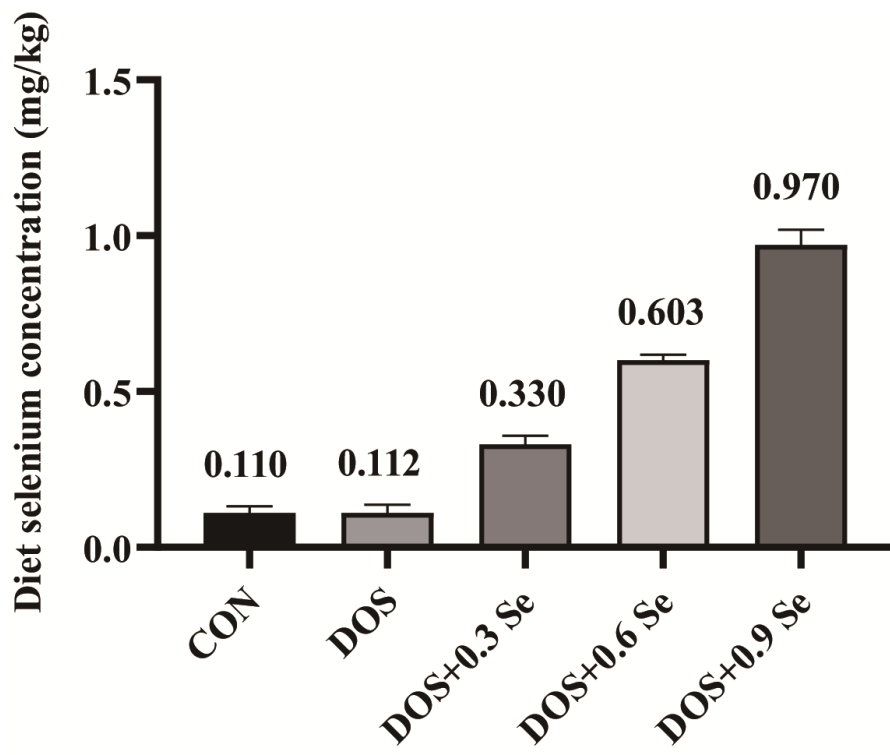

Supplementary Figure S1

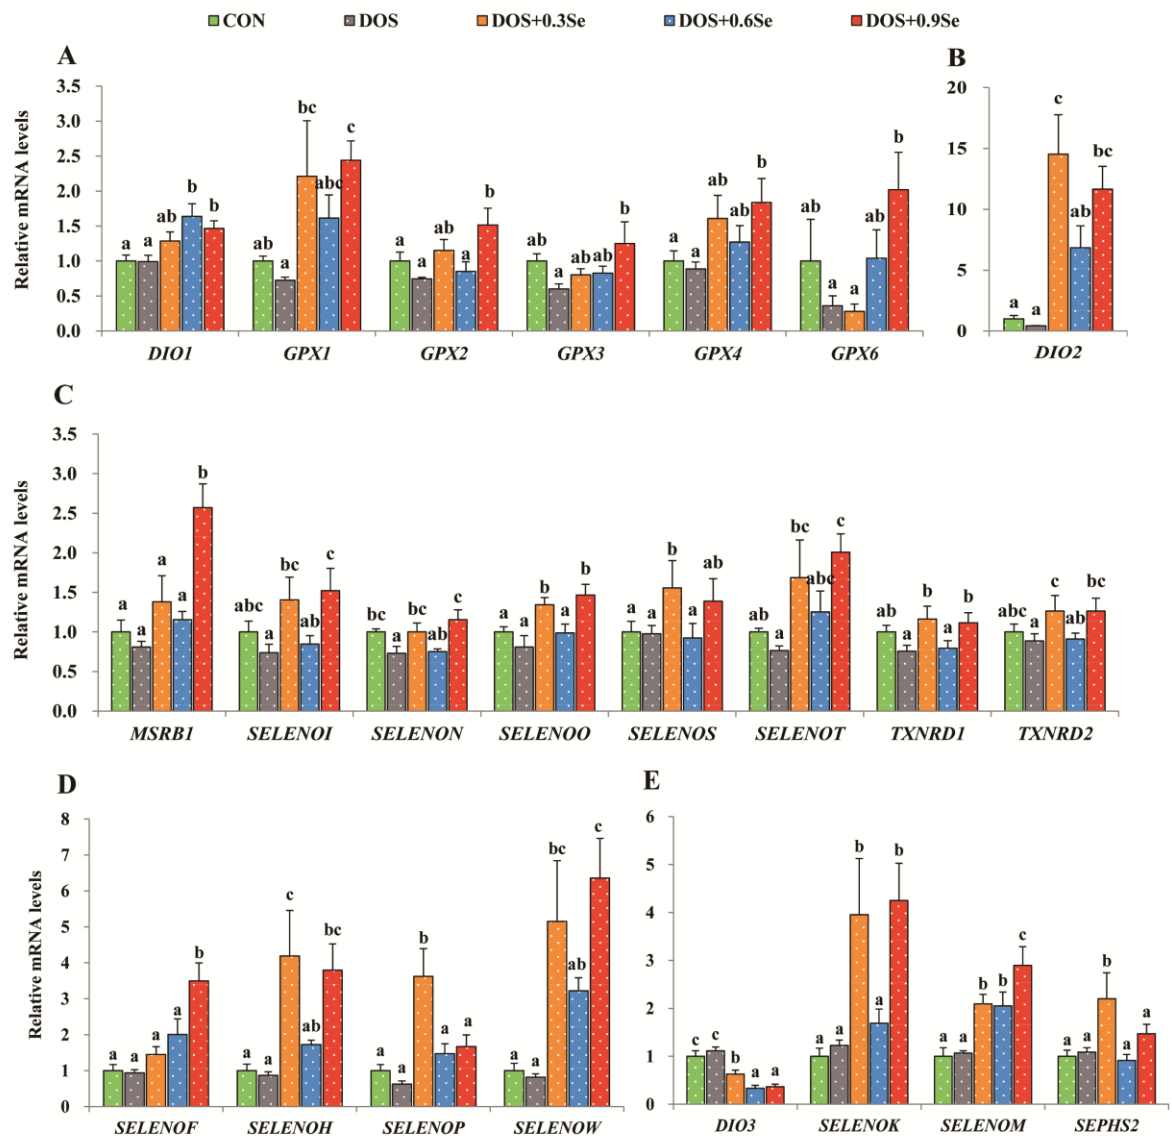

Supplementary Figure S2

Supplement: s1 [file s1]
